# Supplementary material for: Two-dimensional vanadium tetrafluoride with antiferromagnetic ferroelasticity and bidirectional negative Poisson's ratio
Source: Royal Society of Chemistry journal article supplement (doi:10.1039/d0tc04846a), 2020-11-12
Supplement: d0tc04846a1.pdf [file d0tc04846a1.pdf]

## Supplementary Information

### Two-Dimensional Vanadium Tetrafluoride with Antiferromagnetic Ferroelasticity and Bidirectional Negative Poisson's Ratio

*Lei Zhang*<sup>ab</sup>, *Cheng Tang*<sup>ab</sup>, *Aijun Du*<sup>\*ab</sup>

<sup>a</sup> School of Chemistry and Physics, Queensland University of Technology, Gardens Point  
Campus, Brisbane, QLD 4000, Australia

<sup>b</sup> Centre for Materials Science, Queensland University of Technology, Gardens Point Campus,  
Brisbane, QLD 4000, Australia

**Table S1.** The difference between calculated lattice constants and the experimental values for bulk  $\text{VF}_4$  by different functionals and PBE+U methods with variant U values.

|            | PBE   | LDA    | optB88 | optB86b | PBEsol | PBE+U |        |       |
|------------|-------|--------|--------|---------|--------|-------|--------|-------|
|            |       |        |        |         |        | U=1   | U=2    | U=3   |
| $\Delta a$ | 0.052 | -0.079 | 0.041  | 0.063   | 0.022  | 0.067 | 0.101  | 0.095 |
| $\Delta b$ | 0.005 | -0.297 | -0.189 | -0.202  | -0.187 | 0.010 | -0.011 | 0.015 |
| $\Delta c$ | 0.042 | -0.256 | -0.089 | -0.075  | -0.083 | 0.059 | 0.068  | 0.074 |

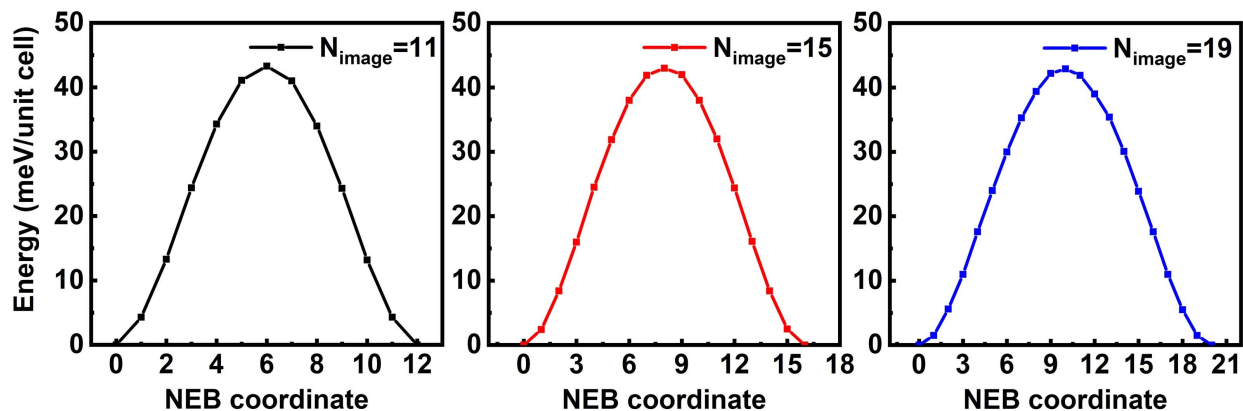

**Figure S1.** The NEB results calculated using 11, 15, and 19 images for the ferroelastic transition of  $\text{VF}_4$  monolayer. The transition barriers calculated using 11, 15, and 19 images are 43.3 meV/unit cell, 43.0 meV/unit cell, and 42.9 meV/unit cell, respectively. Hence, the transition barrier can converge to 1 meV/unit cell even with a low number of image of 11.

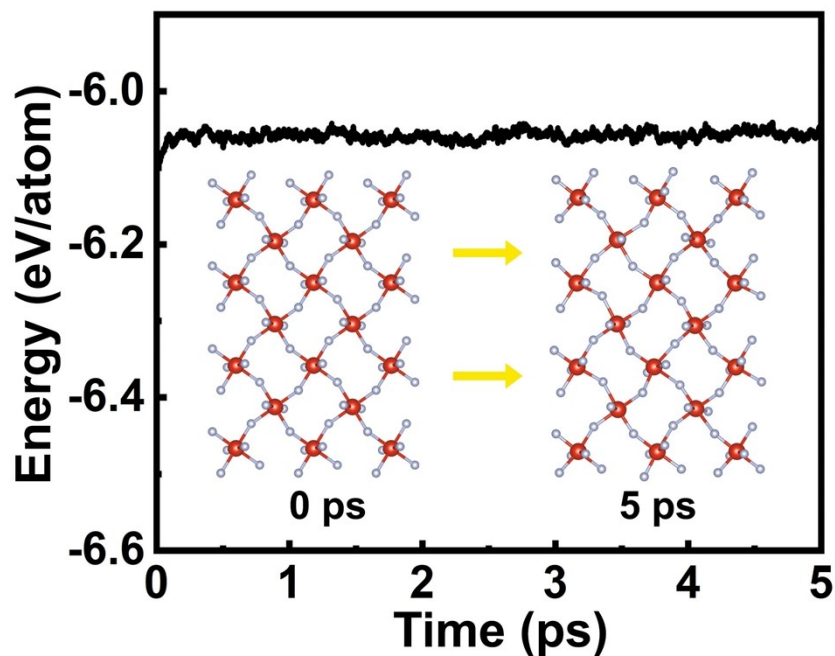

**Figure S2.** The energy evolution of  $\text{VF}_4$  monolayer during AIMD of 5 ps at 300 K. The insets are the initial and final atomic structure.

**Table S2.** Total energy of  $\text{VF}_4$  monolayer in different magnetic configurations. The energy of AFM-2 configuration is set to 0 for comparison. The energy of non-magnetic state is 1.54 eV/unit cell higher than the AFM-2 state, suggesting the robust magnetism in 2D  $\text{VF}_4$ .

| Configuration    | FM    | AFM-1 | AFM-2 | AFM-3 |
|------------------|-------|-------|-------|-------|
| $\Delta E$ (meV) | 46.89 | 23.90 | 0     | 23.35 |

**Table S3.** The MAE ( $\mu\text{eV}$  per V atom) with respect to the easy-axis direction.

| Direction | [100] | [010] | [110] | [101] | [011] | [111] | [001] |
|-----------|-------|-------|-------|-------|-------|-------|-------|
| MAE       | 0     | 28.92 | 26.81 | 39.77 | 34.23 | 13.24 | 35.84 |

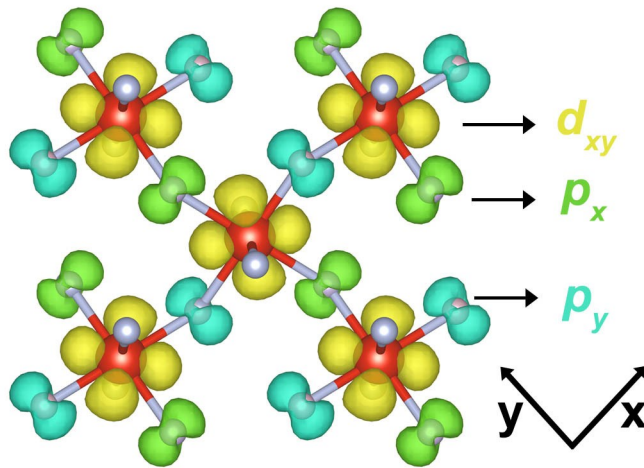

**Figure S3.** The real-space squared wave-function corresponding to the highest valence band at Gamma point. The global coordination axis is rotated to align the  $\text{VF}_6$  octahedra. The  $d_{xy}$  orbitals of V atoms and  $p_{x/y}$  orbitals of F atoms are vividly shown.

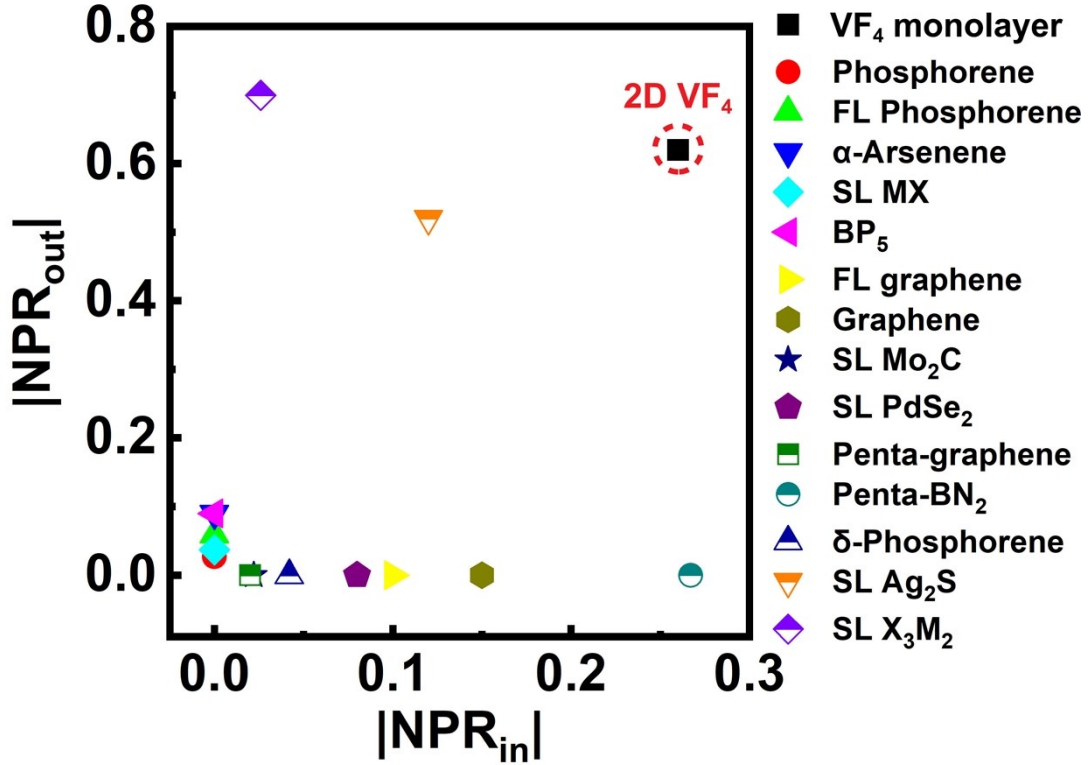

**Figure S4.** The in-plane and out-of-plane NPRs for 2D  $VF_4$ , phosphorene,<sup>1</sup> few-layer (FL) phosphorene,<sup>2</sup>  $\alpha$ -arsenene,<sup>3</sup> single-layer (SL) MX (M = Ge, Sn; X = S, Se),<sup>4</sup>  $BP_5$ ,<sup>5</sup> FL graphene,<sup>6</sup> graphene,<sup>7</sup> SL  $Mo_2C$ ,<sup>8</sup> SL  $PdSe_2$ ,<sup>9</sup> penta-graphene,<sup>10</sup> penta- $BN_2$ ,<sup>11</sup>  $\delta$ -phosphorene,<sup>12</sup> SL  $Ag_2S$ ,<sup>13</sup> and SL  $X_3M_2$ .<sup>14</sup> For clarity, we plot the absolute values here and if it does not exist, we set it to 0. It can be seen that 2D  $VF_4$  possess balanced bidirectional auxeticity and the values of NPR along both directions are among the highest values reported so far.

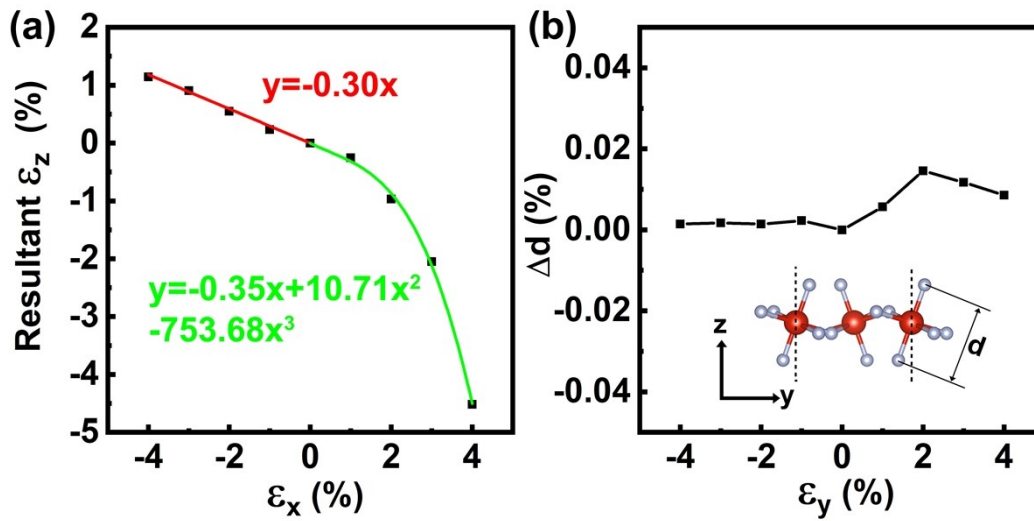

**Figure S5.** (a) Resultant out-of-plane strain as a function of applied strain along the x-direction. The  $v_{out}$  is obtained by fitting  $\varepsilon_{rs} = -a\varepsilon_s + b\varepsilon_s^2 + c\varepsilon_s^3$ ,<sup>13</sup> where  $\varepsilon_s$  and  $\varepsilon_{rs}$  represent the applied and resultant strain respectively, and then  $a$  can be regarded as  $v_{out}$ . The calculated  $v_{out}$  is 0.30 and 0.35 for compressional and tensile strain applied along the x-direction, respectively. (b) The variation of the distance between the upper and lower F atoms in a  $\text{VF}_6$  octahedron upon strain along the y-direction. Clearly, the variation is quite small (less than 0.02%).

## References

1. Y. Du, J. Maassen, W. Wu, Z. Luo, X. Xu and P. D. Ye, *Nano Lett.*, 2016, **16**, 6701-6708.
2. J.-W. Jiang and H. S. Park, *Nat. Commun.*, 2014, **5**, 4727.
3. J. Han, J. Xie, Z. Zhang, D. Yang, M. Si and D. Xue, *Appl. Phys. Express*, 2015, **8**, 041801.
4. X. Kong, J. Deng, L. Li, Y. Liu, X. Ding, J. Sun and J. Z. Liu, *Phys. Rev. B*, 2018, **98**, 184104.
5. H. Wang, X. Li, J. Sun, Z. Liu and J. Yang, *2D Mater.*, 2017, **4**, 045020.
6. S. Woo, H. C. Park and Y.-W. Son, *Phys. Rev. B*, 2016, **93**, 075420.
7. K. V. Zakharchenko, M. I. Katsnelson and A. Fasolino, *Phys. Rev. Lett.*, 2009, **102**, 046808.
8. B. Mortazavi, M. Shahrokhi, M. Makaremi and T. Rabczuk, *Nanotechnology*, 2017, **28**, 115705.
9. G. Liu, Q. Zeng, P. Zhu, R. Quhe and P. Lu, *Comput. Mater. Sci.*, 2019, **160**, 309-314.
10. S. Zhang, J. Zhou, Q. Wang, X. Chen, Y. Kawazoe and P. Jena, *Proc. Natl. Acad. Sci. U.S.A.*, 2015, **112**, 2372-2377.
11. M. Yagmurcukardes, H. Sahin, J. Kang, E. Torun, F. M. Peeters and R. T. Senger, *J. Appl. Phys.*, 2015, **118**, 104303.
12. H. Wang, X. Li, P. Li and J. Yang, *Nanoscale*, 2017, **9**, 850-855.
13. R. Peng, Y. Ma, Z. He, B. Huang, L. Kou and Y. Dai, *Nano Lett.*, 2019, **19**, 1227-1233.
14. Y. Chen, X. Liao, X. Shi, H. Xiao, Y. Liu and X. Chen, *Phys. Chem. Chem. Phys.*, 2019, **21**, 5916-5924.
